# Supplementary material
Source: PubMed Central journal article supplement (PMC2075188)
Supplement: jphysiol_2007.129106_1.pdf [file jphysiol_2007.129106_1.pdf]

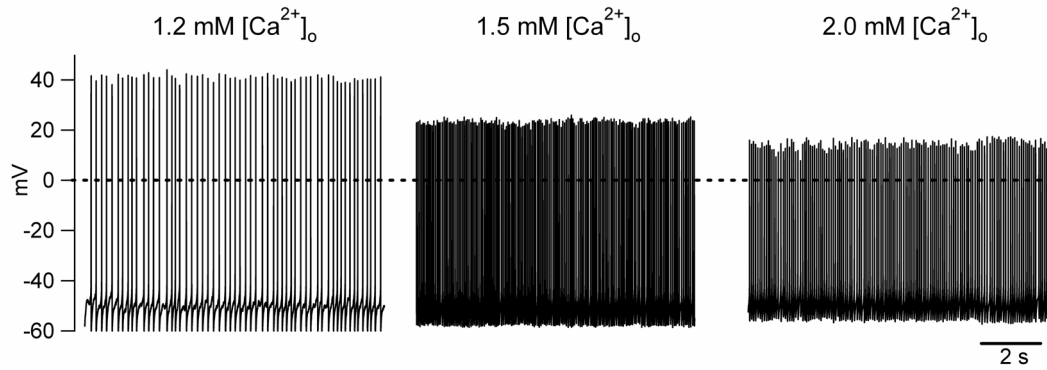

**Supplemental Figure 1. UBCs are intrinsically firing in various extracellular calcium concentrations.**

Whole cell recordings from a UBC bathed in extracellular solutions containing 1.2, 1.5 and 2 mM calcium. Increasing the extracellular calcium concentration did not influence the ability of UBCs to fire spontaneously.
